# Supplementary material for: Effect of Enhanced Medical Rehabilitation on Functional Recovery in Older Adults Receiving Skilled Nursing Care After Acute Rehabilitation: A Randomized Clinical Trial
Source: JAMA Netw Open. 2019 Jul 31;2(7):e198199. doi: 10.1001/jamanetworkopen.2019.8199 (PMC6669784; doi:10.1001/jamanetworkopen.2019.8199)
Supplement: Supplement 3. — Data Sharing Statement [file jamanetwopen-2-e198199-s003.pdf]

# Data Sharing Statement

Lenze. Effect of Enhanced Medical Rehabilitation on Functional Recovery in Older Adults Receiving Skilled Nursing Care After Acute Rehabilitation. *JAMA Netw Open*. Published July 31, 2019. 10.1001/jamanetworkopen.2019.8199

## Data

**Data available:** Yes

**Data types:** Deidentified participant data

**How to access data:** email: [lenarde@wustl.edu](mailto:lenarde@wustl.edu)

**When available:** With publication

## Supporting Documents

**Document types:** None

## Additional Information

**Who can access the data:** researchers whose proposed use of the data has been approved

**Types of analyses:** for a specified purpose

**Mechanisms of data availability:** without investigator support, after approval of a proposal, and with a signed data access agreement

**Any additional restrictions:** none
